# Supplementary material
Source: MDPI journal article supplement (https://www.mdpi.com/2073-8994/13/8/1332)
Supplement: s1 [file s1 › symmetry-1307751-supplementary.pdf]

# An fcu Th-MOF Constructed from In Situ Coupling of Monovalent Ligands

Ting Song, Wenlei Tang, Chuer Bao, Qiuxue Lai, Zhiyuan Zhang, Xuan Feng and Chong Liu\*

School of Chemical Engineering, Sichuan University, Chengdu, 610065, China.

\*Correspondence: liuchong@scu.edu.cn

## S1. Methods

**X-ray Crystallography.** Single-crystal XRD data were collected on a Bruker D8 Venture single-crystal X-ray diffractometer (Mo K $\alpha$  radiation,  $\lambda = 0.71073$  Å). The data were collected and integrated to 0.85 Å by Bruker program SAINT[1], empirical absorption correction was applied using program SADAB[1]. The structure was solved with direct method using SHELXT[2] and refined by full-matrix least-squares on F<sup>2</sup> using SHELXL[3] in Olex2[4]. All non-H atoms were located easily and refined anisotropically. Idealized atom positions were calculated for H atoms. Details of the refinement were given in **Table S1**.

**Table S1 Crystal data and structure refinement details for SUM-5.**

|                                                |                                                                                 |
|------------------------------------------------|---------------------------------------------------------------------------------|
| CCDC deposition number                         | 2085727                                                                         |
| Compound name                                  | st025401                                                                        |
| Formula                                        | C <sub>84</sub> H <sub>48</sub> N <sub>12</sub> O <sub>38</sub> Th <sub>6</sub> |
| Formula weight                                 | 3225.58                                                                         |
| Temperature/K                                  | 293.25                                                                          |
| habit                                          | octahedral                                                                      |
| Crystal system                                 | Cubic                                                                           |
| Space group                                    | Fm-3m                                                                           |
| a,b,c/Å                                        | 30.5859(19)                                                                     |
| $\alpha, \beta, \gamma/^\circ$                 | 90                                                                              |
| Volume/Å <sup>3</sup>                          | 28613(5)                                                                        |
| Z                                              | 4                                                                               |
| $\rho_{\text{calcd}}/\text{cm}^3$              | 0.749                                                                           |
| $\mu/\text{mm}^{-1}$                           | 3.129                                                                           |
| Radiation                                      | MoK $\alpha$ ( $\lambda = 0.71073$ )                                            |
| 2 $\theta$ range for data collection/ $^\circ$ | 3.766 to 49.614                                                                 |
| Index ranges                                   | -35 $\leq h \leq$ 36, -36 $\leq k \leq$ 36, -36 $\leq l \leq$ 36                |
| Reflections collected                          | 173850                                                                          |

|                                                |                                                                  |
|------------------------------------------------|------------------------------------------------------------------|
| Independent reflections                        | 1290 [ $R_{\text{int}} = 0.2321$ , $R_{\text{sigma}} = 0.0299$ ] |
| Goodness-of-fit on $F^2$                       | 1.120                                                            |
| Final R indexes [ $I \geq 2\sigma(I)$ ]        | $R_1 = 0.0622$ , $wR_2 = 0.1696$                                 |
| Final R indexes [all data]                     | $R_1 = 0.0777$ , $wR_2 = 0.1881$                                 |
| Largest diff. peak/hole / $e \text{ \AA}^{-3}$ | 1.63/-1.18                                                       |

---

#### Level A alerts:

PLAT430\_ALERT\_2\_A Short Inter D...A Contact N1 ..N1 . 0.64 Ang.

1-x,1/2-z,1/2-y = 43\_655 Check

PLAT430\_ALERT\_2\_A Short Inter D...A Contact N1 ..N1 . 1.13 Ang.

x,1/2-y,1/2-z = 28\_555 Check

**Response:** Due to the symmetry of the crystals, the azo moiety is disordered at two positions of equivalent probabilities, causing the short interatomic distances.

PLAT973\_ALERT\_2\_A Check Calcd Positive Resid. Density on Th01 2.19 eA-3

**Response:** The atom type is correct, and no twinning. The crystal showed strong diffuse scattering between Bragg peaks. This is believed to be the source of the high electron density on Th. The structural model is unaffected.

**Powder X-ray diffraction (PXRD).** PXRD data were collected on Rigaku MiniFlex600 at 40 kV, 40 mA for Cu  $K\alpha$  ( $\lambda = 1.54178 \text{ \AA}$ ) with a scan speed of  $10^\circ/\text{min}$  from  $3$  to  $50^\circ$  at a step size of  $0.01^\circ$ . The simulated PXRD pattern was produced from the CIF of **SUM-5** using Mercury 2020.2.0 (Build 290188).

**Fourier Transform Infrared (FT-IR) Spectroscopy.** The FT-IR spectrum was collected in the range of  $400\text{--}4000 \text{ cm}^{-1}$  on a Spectrum Two Li10014 infrared spectrometer using KBr pellet.

**$N_2$  Sorption and Brunauer-Emmett-Teller (BET) Analysis.** After solvothermal synthesis, **SUM-5** crystals were removed from the mother liquor and washed copiously with fresh DMF. Then the crystals were soaked in 20 mL of DCM three times over 1 h (20 min each) and subsequently immersed in 20 mL n-hexane three times over 1h (20 min each). Finally, after removal of most of the n-hexane, the crystals were transferred to a round-bottom flask on a Schlenk vacuum line and evacuated for 3 h before activated at the degas station under vacuum at ambient temperature for 24 h before  $N_2$  uptake measurement taking place on BELSORP MAX.

**Thermogravimetric Analysis (TGA).** **SUM-5** crystals were washed with DMF/DCM (as described above) and then briefly dried in a  $N_2$  flow. The experiment was performed in a constant  $N_2$  flow ( $100 \text{ mL/min}$ ) at a heating rate of  $5^\circ\text{C/min}$  from room temperature ( $\sim 27^\circ\text{C}$ ) to  $900^\circ\text{C}$ .

## S2. Syntheses

*Caution! Th-232 used in this study is an  $\alpha$  emitter with daughter of radioactive Ra-228 and  $\gamma$ -emitter with daughter of radioactive Tl-208. All thorium compounds used and investigated were operated in an authorized laboratory designed for actinide element studies. Standard precautions with suitable care and specific protection against  $\alpha$  and  $\gamma$  radiation for handling radioactive*

materials should be followed.

**Synthesis of 4-nitrosobenzoic acid, L1.** 4-aminobenzoic acid (1 g, 7.3 mmol) was suspended in DCM (12 mL). A solution of Oxone (8.97 g, 14.6 mmol) dissolved in water (45 mL) was added to the DCM solution and the mixture was continuously stirred under nitrogen atmosphere at room temperature for 1 hour. The yellow precipitate was then collected and washed with pure water and dried in vacuum at 30 °C for 2 days. Yield: 1.07 g, 98%. <sup>1</sup>H NMR (DMSO-*d*<sub>6</sub>, 400 MHz): 13.667(br, 1H), 8.26-8.28(d, *J*=8.0 Hz, 2H), δ= 8.05-8.03(d, *J*=8.0 Hz, 2H).

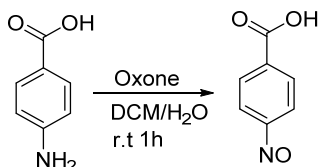

**Scheme S1.** Synthesis of L1.

**Synthesis of SUM-5.** L1 (10 mg), Th(NO<sub>3</sub>)<sub>4</sub>·xH<sub>2</sub>O (10 mg) were ultrasonically dissolved in 1.0 mL DMF in a 4 ml Pyrex vial sealed tightly. The mixture was heated in an oven at 120 °C for 48 hours. Orange single crystals were filtered, washed with fresh DMF (3x1ml). Alternative synthetic protocol: L1 (10 mg), Th(NO<sub>3</sub>)<sub>4</sub>·xH<sub>2</sub>O (10 mg) and formic acid (0.2 ml) were ultrasonically dissolved in 1.3 mL DMF in a 4 ml Pyrex vial sealed tightly. The vial was placed in an autoclave and heated in an oven at 150 °C for 48 hours. After cooling down to room temperature, orange octahedral crystals were collected and washed with fresh DMF (3x1ml). Yield, 50% based on L1. For <sup>1</sup>H NMR, the crystals soaked in DMF were exchanged with DCM (3x1ml) and dried in vacuum, digested in a mixture of DMSO-*d*<sub>6</sub> (0.5 mL) and DCl in D<sub>2</sub>O (20%, 0.02 mL) before transferring the clear solution into an NMR tube. <sup>1</sup>H NMR (DMSO-*d*<sub>6</sub>, 400MHz): δ=8.09-8.12 (m, 4H), δ=7.94-7.97 (m, 4H). FT-IR (KBr, 400-4000 cm<sup>-1</sup>): 2987cm<sup>-1</sup>, 2923cm<sup>-1</sup>, 1652cm<sup>-1</sup>, 1595cm<sup>-1</sup>, 1547cm<sup>-1</sup>, 1412cm<sup>-1</sup>, 1098cm<sup>-1</sup>, 1011cm<sup>-1</sup>, 873cm<sup>-1</sup>, 792cm<sup>-1</sup>, 707cm<sup>-1</sup>, 544cm<sup>-1</sup>.

**Modulated synthesis of SUM-5.** L1 (10 mg), Th(NO<sub>3</sub>)<sub>4</sub>·xH<sub>2</sub>O (10 mg) and nitrosobenzene (10 mg) were ultrasonically dissolved in 1.0 mL DMF in a 4 ml Pyrex vial sealed tightly. The mixture was heated in an oven at 100 °C for 48 hours. Orange to yellow single crystals were collected.

### S3. Figures and Tables

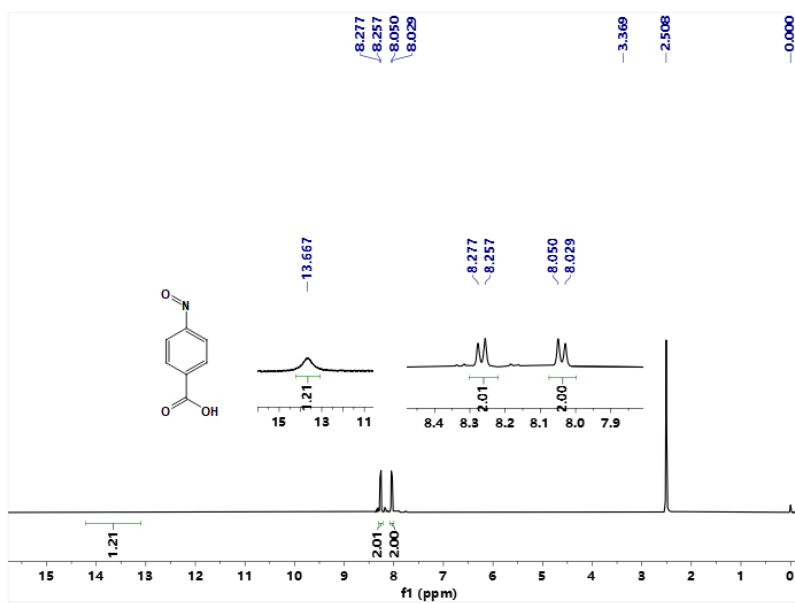

Figure S1. <sup>1</sup>H NMR spectrum of L1 in DMSO-*d*<sub>6</sub>.

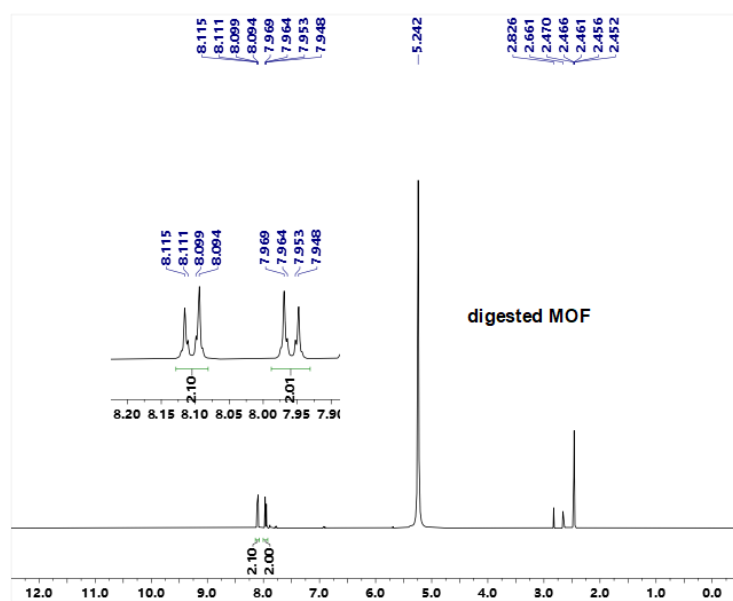

Figure S2. <sup>1</sup>H NMR spectrum of digested SUM-5 in DMSO-*d*<sub>6</sub>.

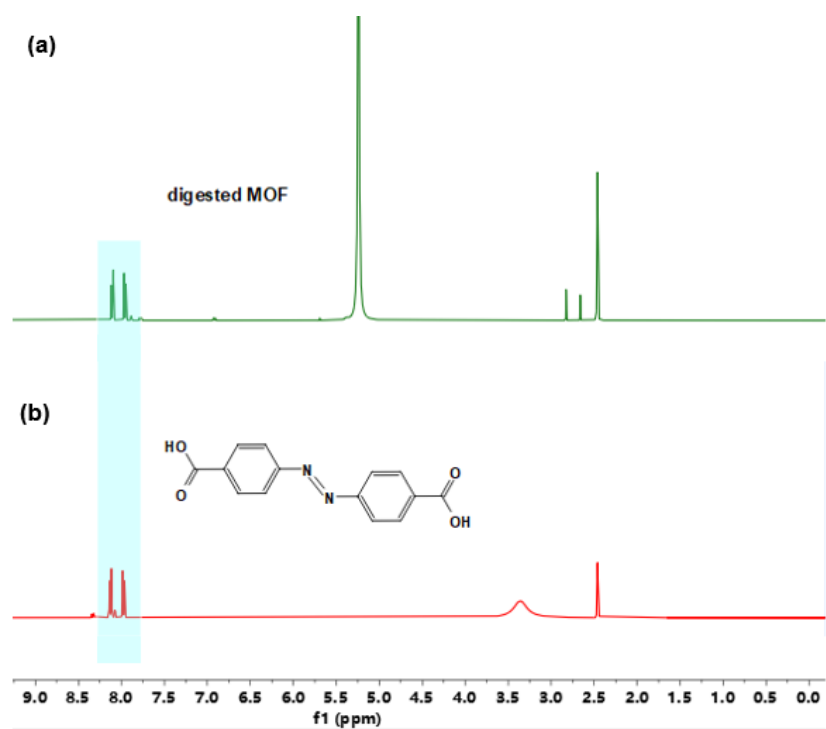

Figure S3.  $^1\text{H}$  NMR spectra comparison of (a) digested **SUM-5** and (b) azobenzene dicarboxylic acid in  $\text{DMSO-}d_6$ .

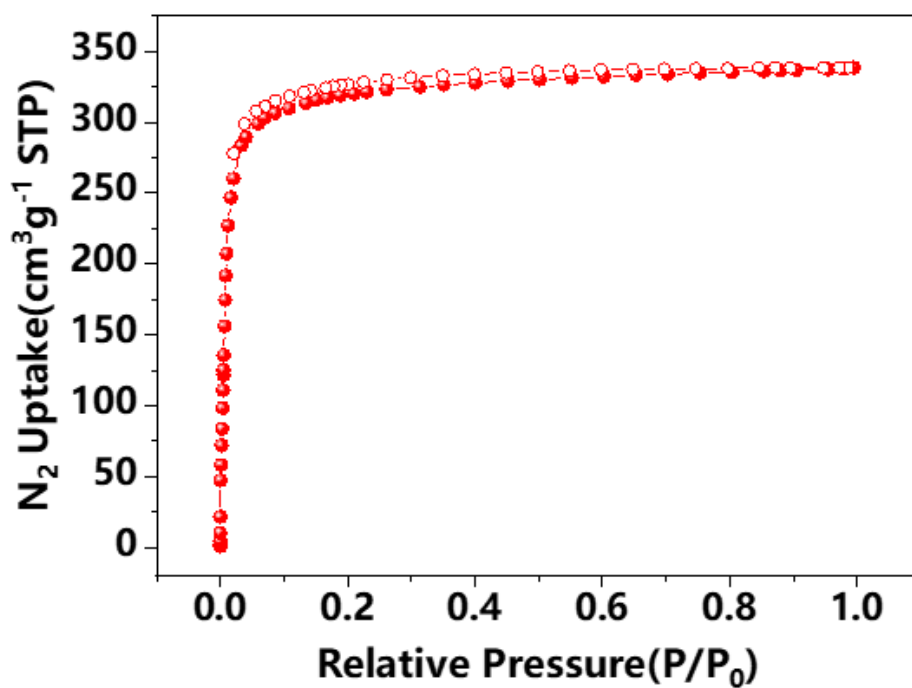

Figure S4.  $\text{N}_2$  sorption isotherm of **SUM-5** (adsorption: filled circles; desorption: open circles).

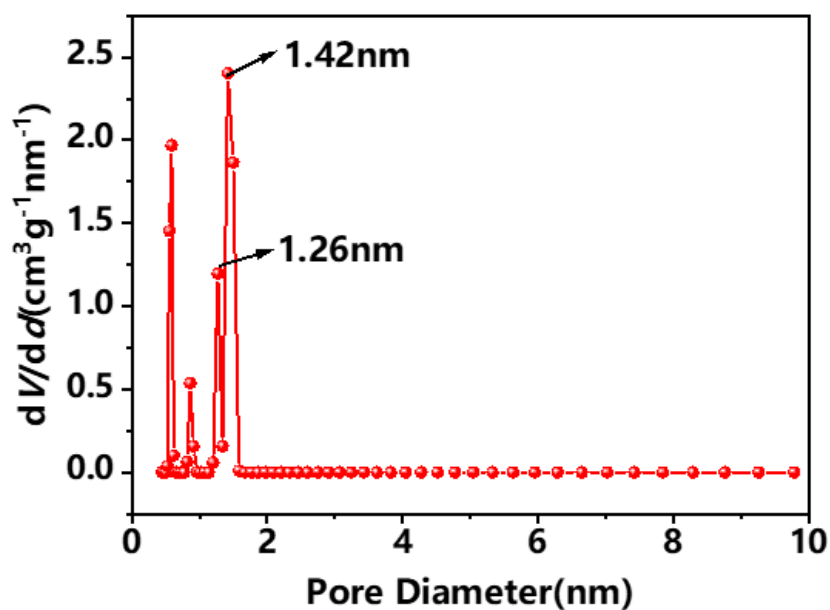

**Figure S5.** Pore size distribution plot of **SUM-5**.

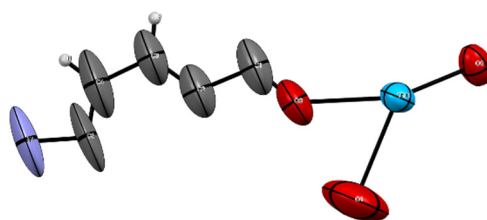

**Figure S6.** ORTEP diagram of the asymmetric unit of **SUM-5** (50% probability factor for the thermal ellipsoids), generated in Mercury 2020.2.0 (Build 290188)<sup>5</sup>.

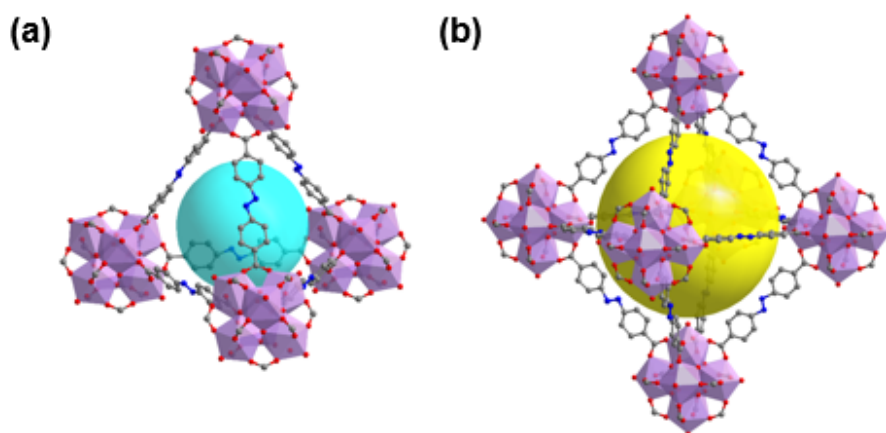

**Figure S7.** Crystal structure of **SUM-5**, showing (a) tetrahedral cage and (b) octahedral cage. Cyan sphere and yellow sphere represent the tetrahedral and octahedral cavity, respectively. Atom colors: Th,

purple polyhedra; C, grey spheres; N, blue spheres; O, red spheres. H atoms are omitted for clarity.

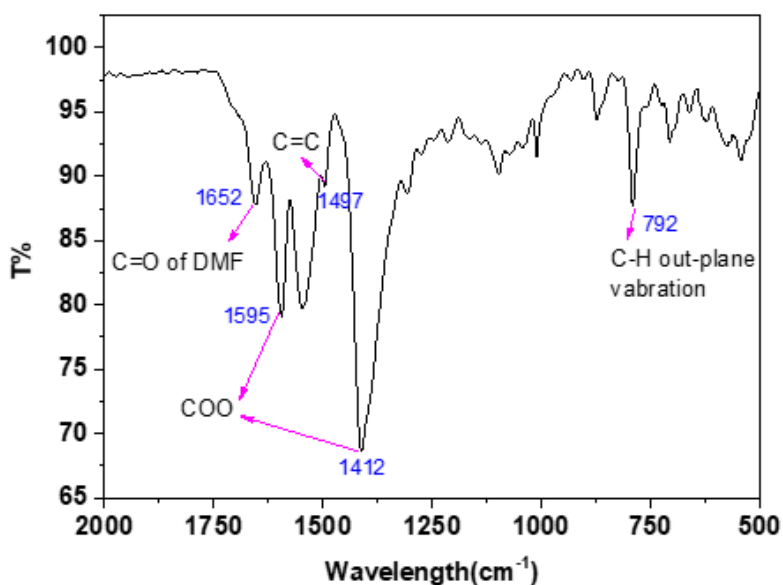

Figure S8. FT-IR spectrum of SUM-5.

#### S4. References

1. APEX2, SAINT, and SADABS ed.; Bruker AXS Inc.: Madison WI, USA, **2014**.
2. Sheldrick, G. SHELXT - Integrated space-group and crystal-structure determination. *Acta Cryst. Section A*. **2015**, *71*, 3-8.
3. Sheldrick, G. Crystal structure refinement with SHELXL. *Acta Cryst. Section C*. **2015**, *71*, 3-8.
4. Dolomanov, O.V.; Bourhis, L.J.; Gildea, R.J.; Howard, J.A.K.; Puschmann, H. OLEX2: a complete structure solution, refinement and analysis program. *J. Appl. Cryst.* **2009**, *42*, 339-341.
5. Macrae, C.F.; Bruno, I.J.; Chisholm, J.A.; Edgington, P.R.; McCabe, P.; Pidcock, E.; Rodriguez-Monge, L.; Taylor, R.; van de Streek, J.; Wood, P.A. Mercury CSD 2.0-new features for the visualization and investigation of crystal structures. *J. Appl. Cryst.* **2008**, *41*, 466-470.
